# Supplementary material for: The characterization of long-range transported North American biomass burning plumes: what can a multi-wavelength Mie–Raman-polarization-fluorescence lidar provide?
Source: Copernicus journal article supplement (doi:10.5194/acp-22-5399-2022), 2022-04-25
Supplement: Supplementary file 1 [file acp-22-5399-2022-supplement.pdf]

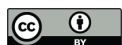

*Supplement of*

**The characterization of long-range transported North American biomass burning plumes: what can a multi-wavelength Mie–Raman-polarization-fluorescence lidar provide?**

**Qiaoyun Hu et al.**

*Correspondence to:* Qiaoyun Hu ([qiaoyun.hu@univ-lille.fr](mailto:qiaoyun.hu@univ-lille.fr))

The copyright of individual parts of the supplement might differ from the article licence.

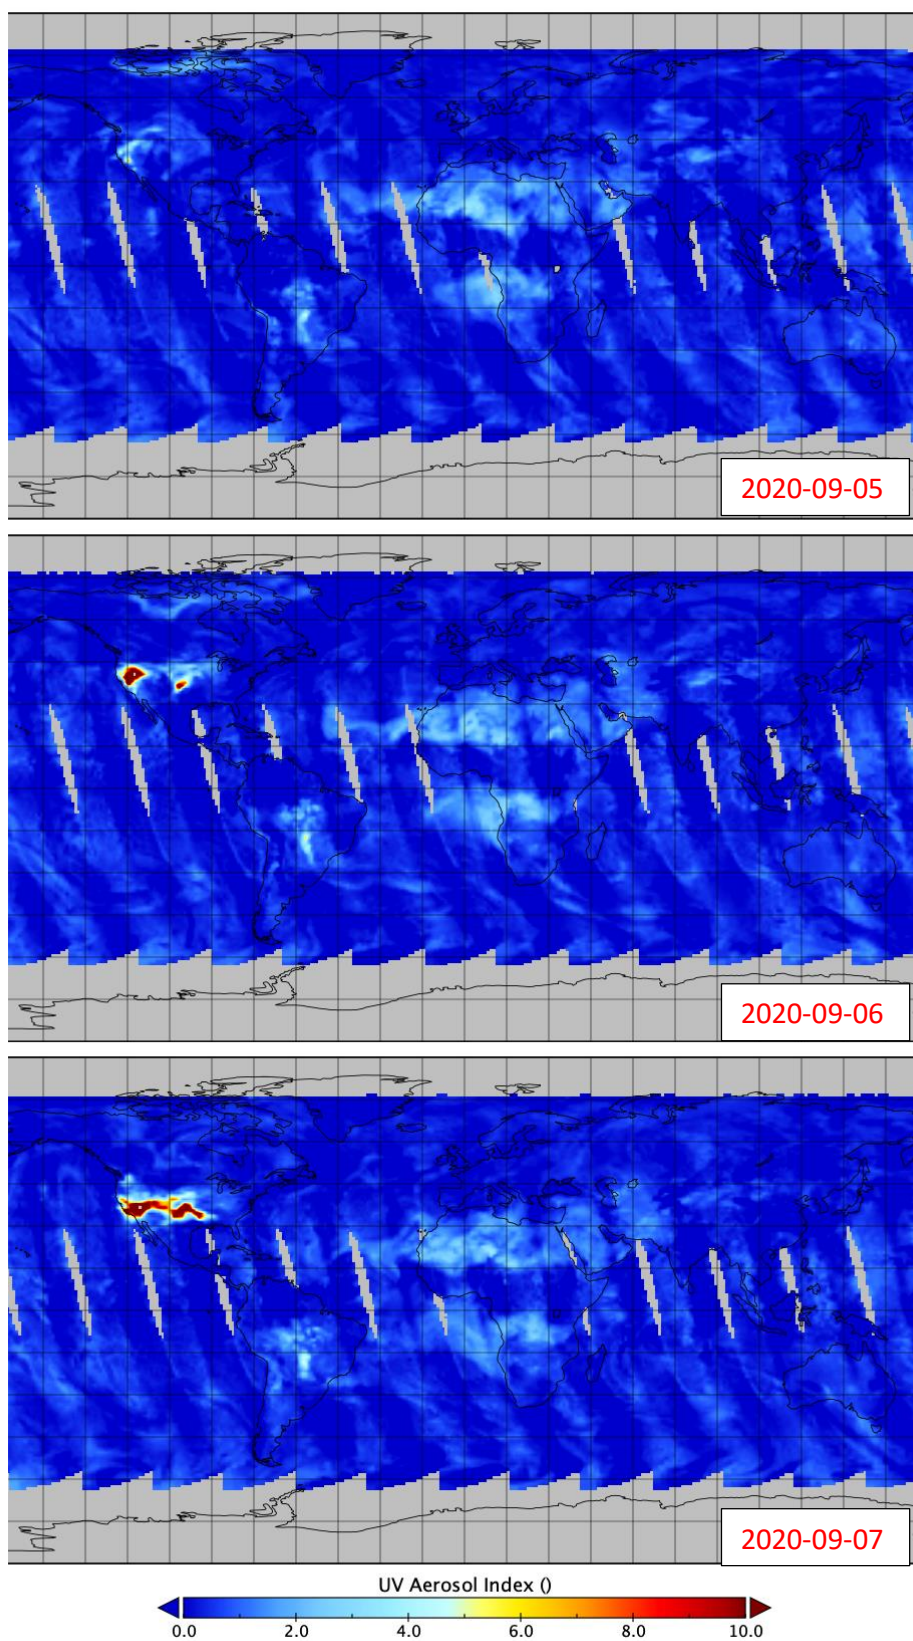

Figure S1: UVAI (UV aerosol index) measured by OMPS instruments.

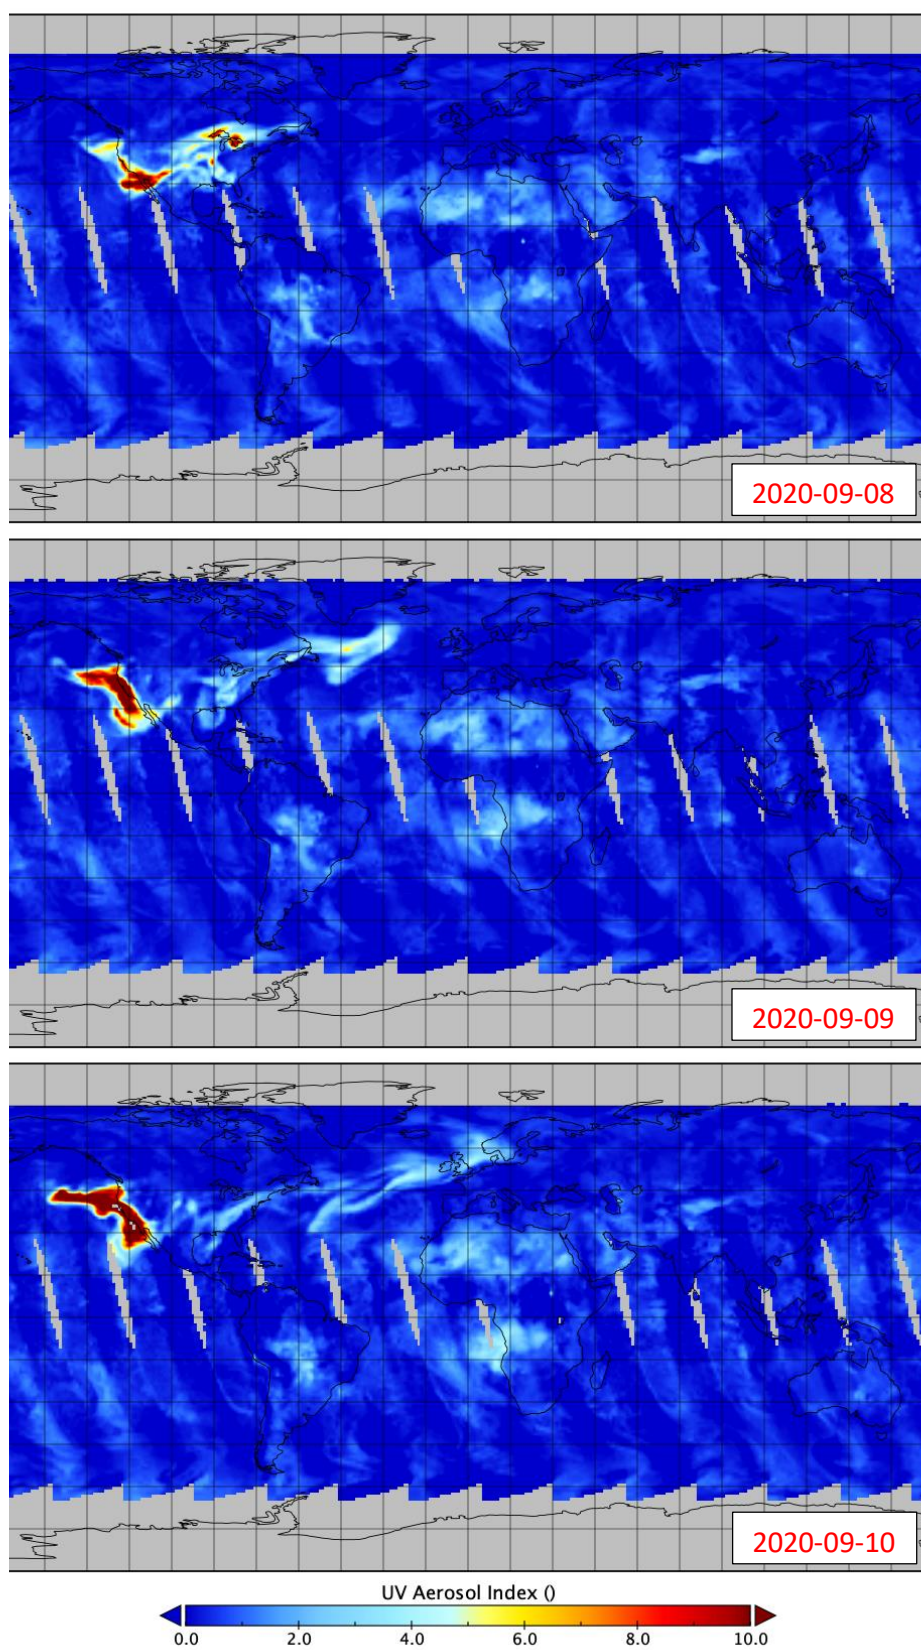

Figure S1: (Continued) UVAI (UV aerosol index) measured by OMPS instruments.



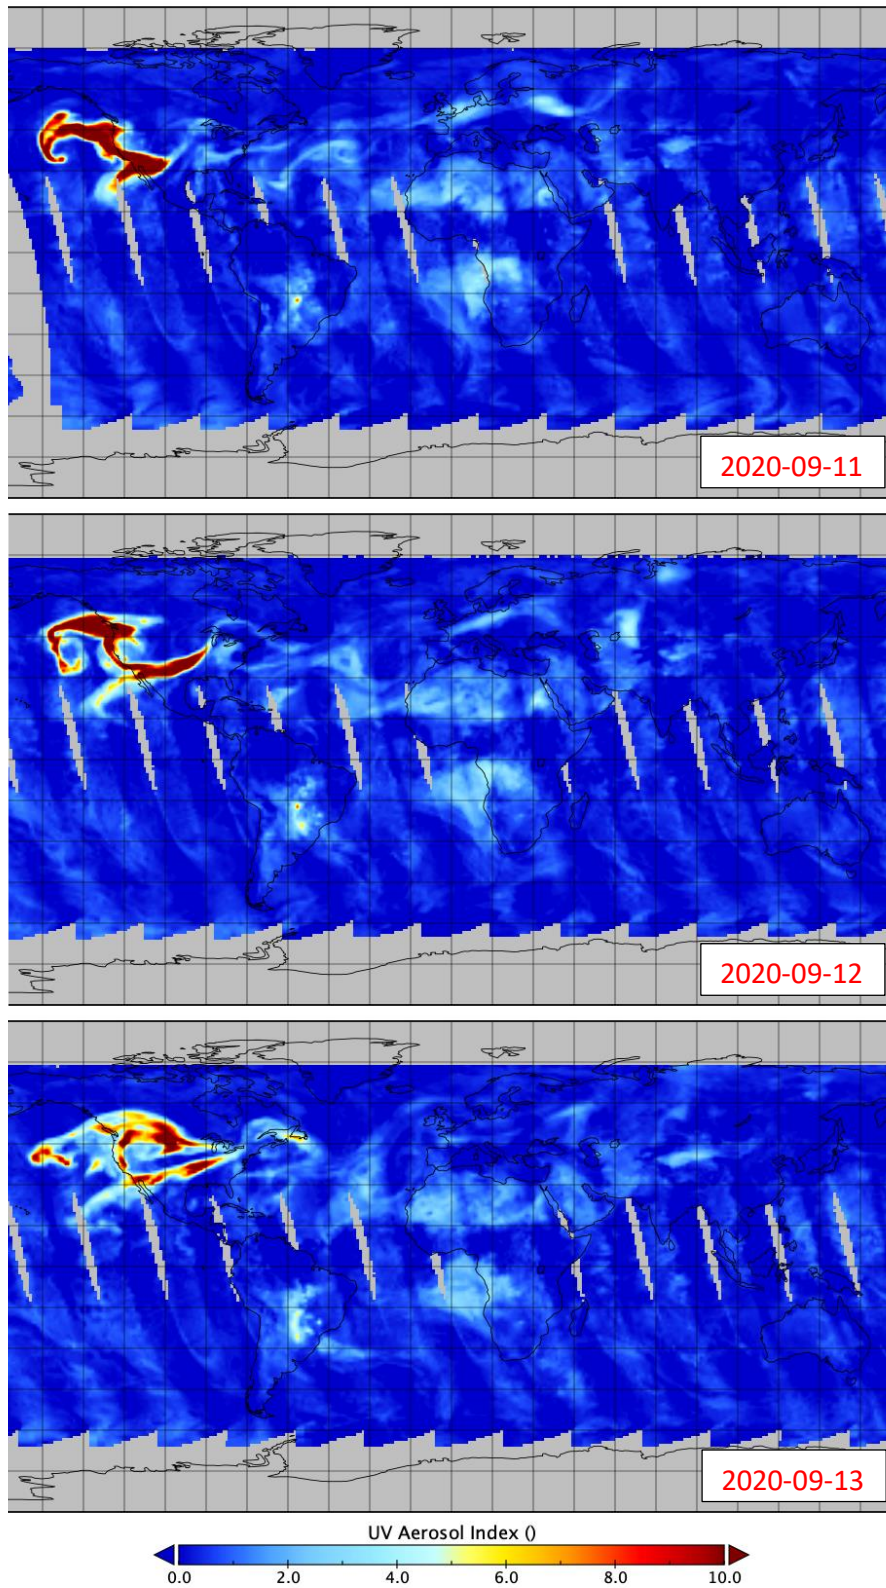

Figure S1: (Continued) UVAI (UV aerosol index) measured by OMPS instruments.

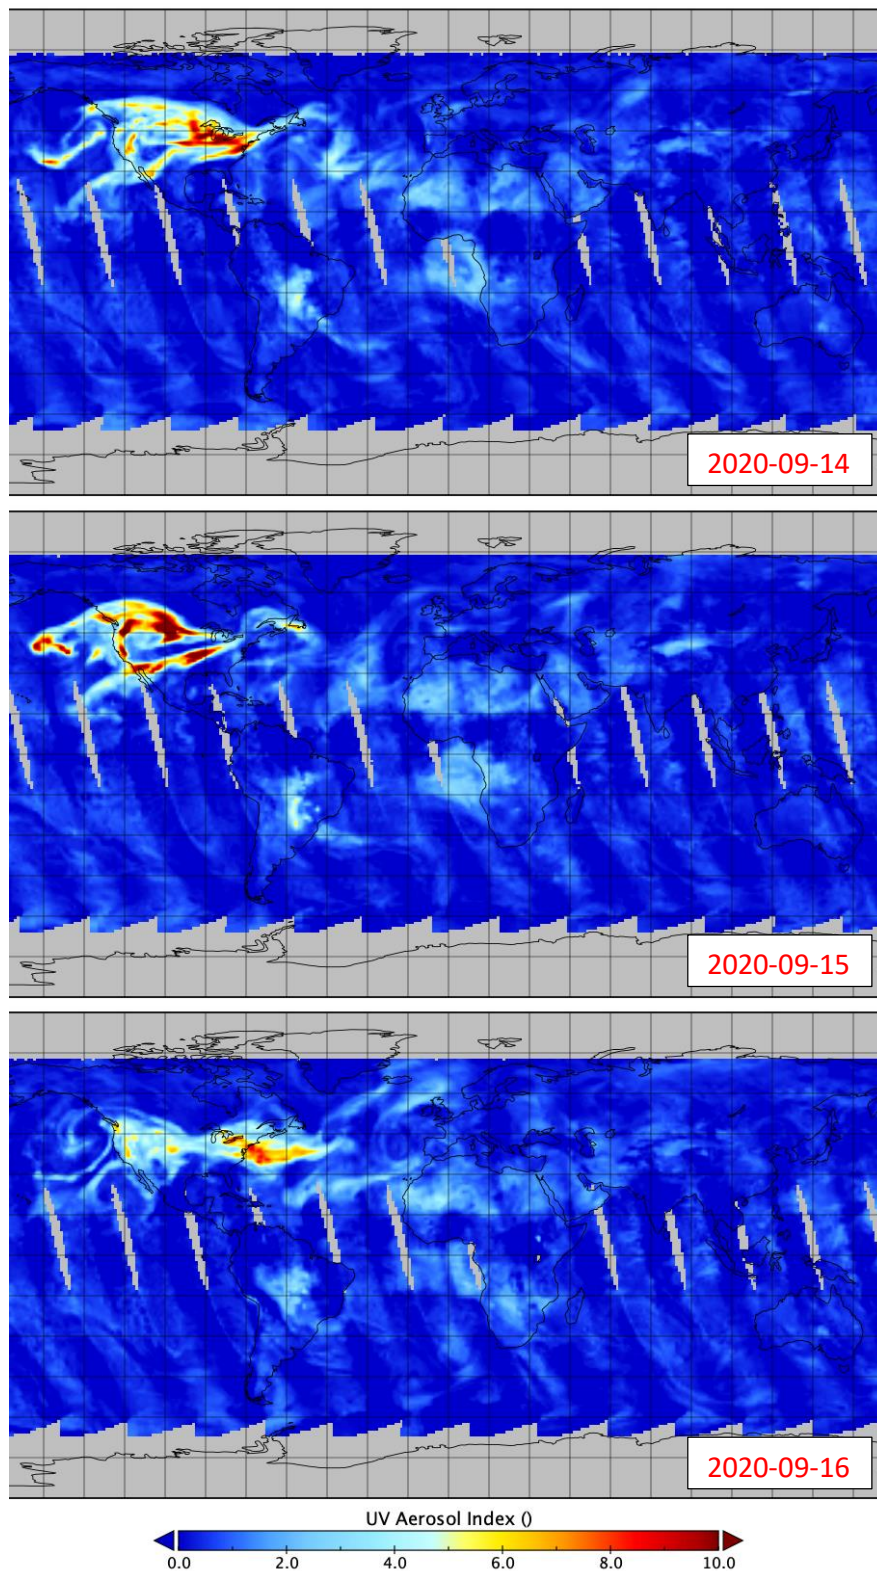

Figure S1: (Continued) UVAI (UV aerosol index) measured by OMPS instruments.



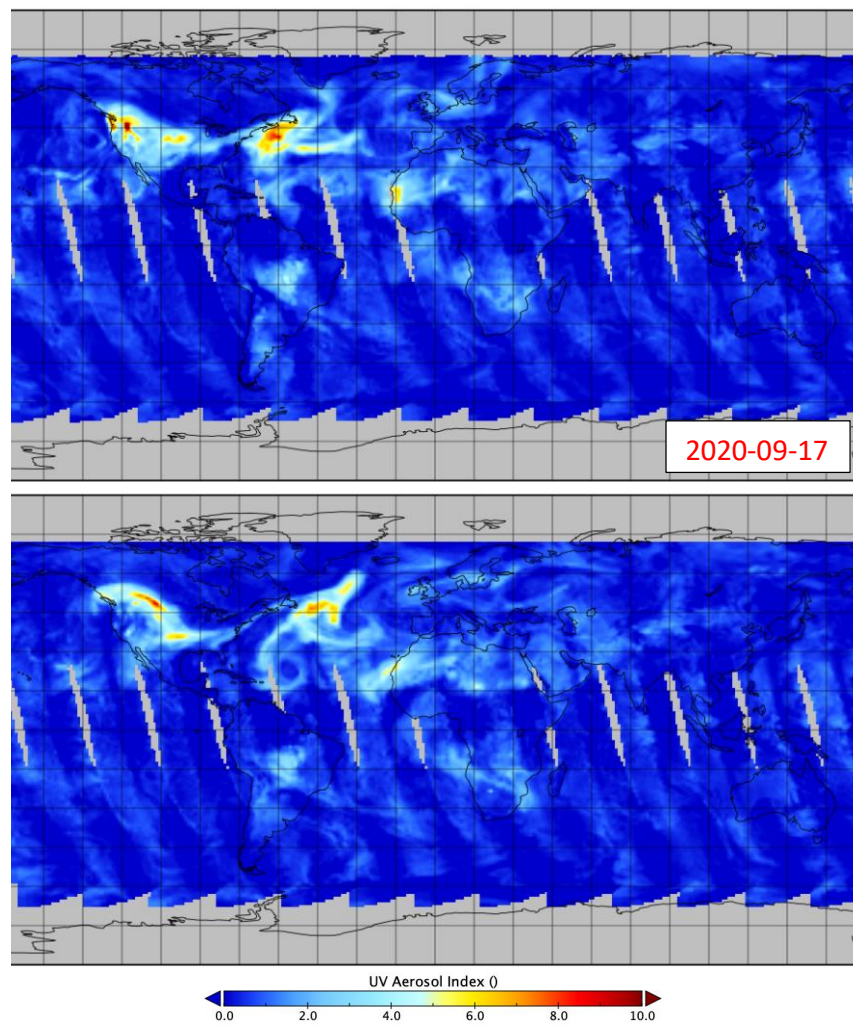

Figure S1: (Continued) UVAI (UV aerosol index) measured by OMPS instruments.

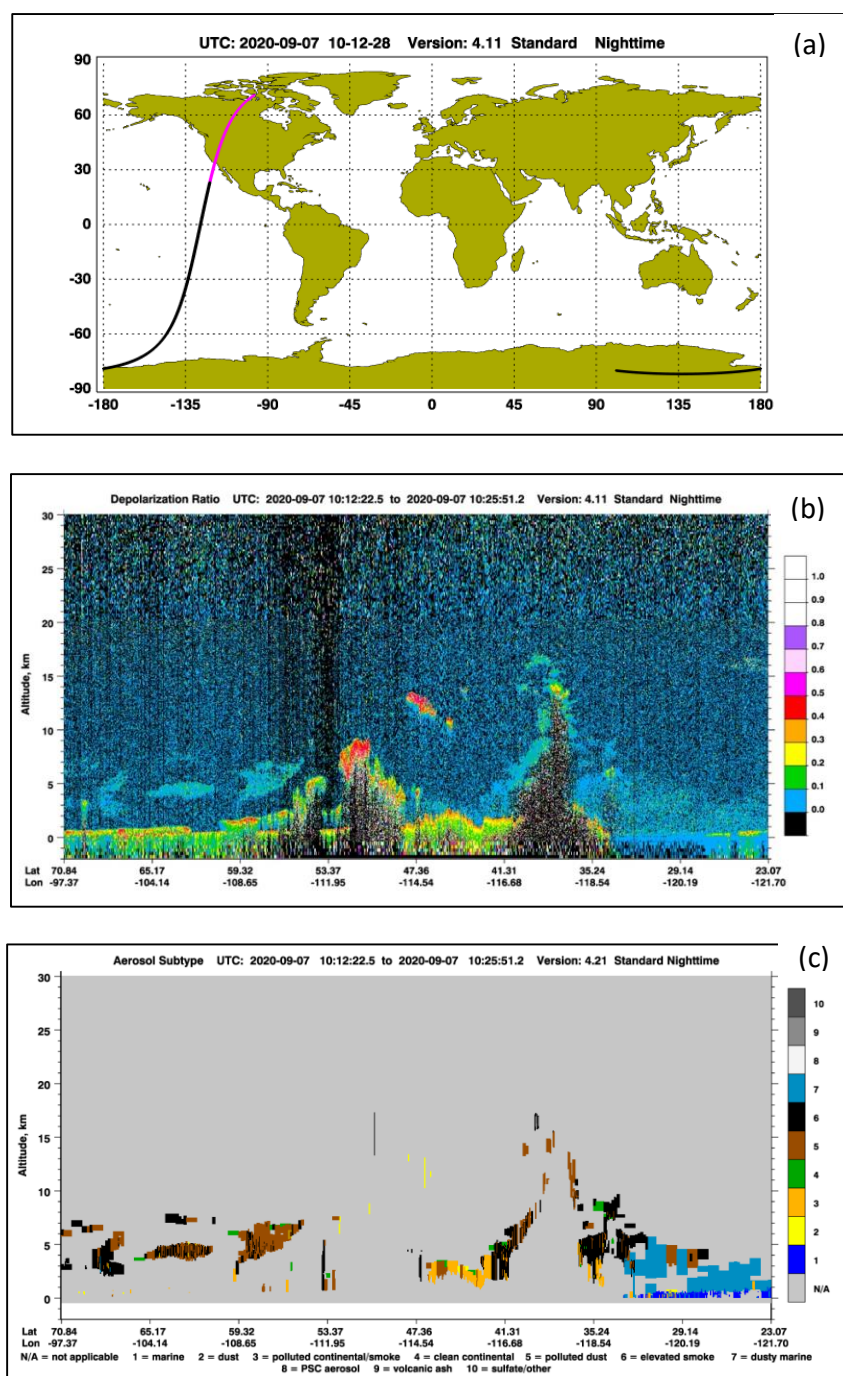

Figure S2: Observations of CALIPSO on 07 September 2020. (a) CALIPSO orbit track, (b) depolarization ratio at 532 nm, (c) aerosol subtype on 2020-09-07. A towering like pyro-cumulonimbus cloud with smoke from Creek fire was detected between (41.31N,116.68W) and (35.24N,118.54W)

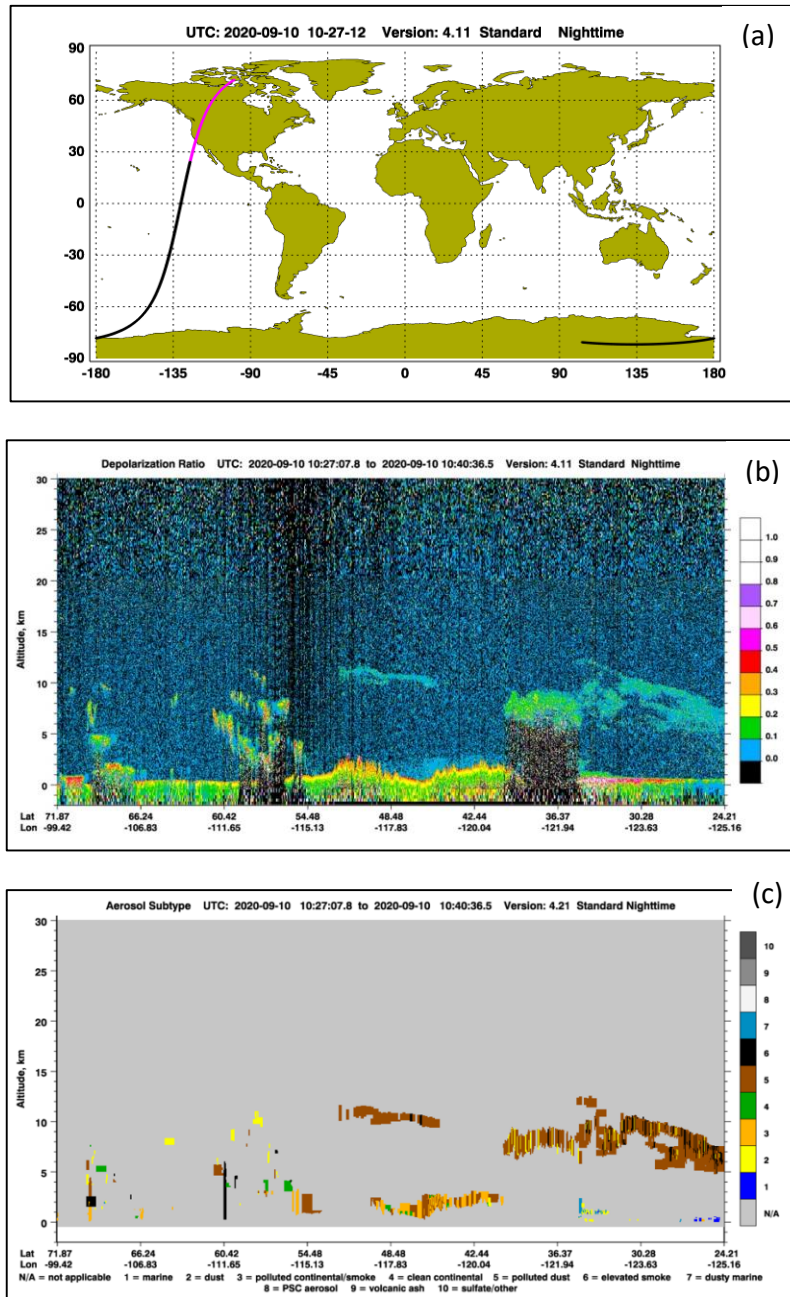

Figure S3: Observations of CALIPSO on 10 September 2020. (a) CALIPSO orbit track, (b) depolarization ratio at 532 nm, (c) aerosol subtype on 2020-09-10.
